# Supplementary material for: Proteotyping as alternate typing method to differentiate Campylobacter coli clades
Source: PubMed Central journal article supplement (PMC6414644; doi:10.1038/s41598-019-40842-w), 2019-03-12
Supplement: 41598_2019_40842_MOESM1_ESM.pdf [file 41598_2019_40842_MOESM1_ESM.pdf]

## Supplementary Tables

**Supplementary Table 1. List of all *C. coli* and *C. jejuni* isolates included in the study**

| No. | Isolate      | Year of isolation | Origin              | MLST-ST | asp | gln | glt | gly | pgm | tkr | unc | Clade |
|-----|--------------|-------------------|---------------------|---------|-----|-----|-----|-----|-----|-----|-----|-------|
| 1   | BFR-CA-6144  | 2007              | Wild pheasant, Meat | 829     | 33  | 39  | 30  | 82  | 113 | 43  | 17  | 1A    |
| 2   | BFR-CA-7268  | 2009              | Bivalvia            | 855     | 33  | 39  | 30  | 79  | 104 | 35  | 17  | 1A    |
| 3   | BFR-CA-8266  | 2010              | Boar                | 1096    | 33  | 38  | 30  | 82  | 104 | 35  | 17  | 1A    |
| 4   | BFR-CA-8393  | 2010              | Turkey, Egg         | 7018    | 114 | 195 | 103 | 115 | 459 | 164 | 79  | 1C    |
| 5   | BFR-CA-8905  | 2010              | Pig, Liver          | 854     | 33  | 38  | 30  | 82  | 104 | 43  | 17  | 1A    |
| 6   | BFR-CA-8971  | 2010              | Eurasian otter      | 829     | 33  | 39  | 30  | 82  | 113 | 43  | 17  | 1A    |
| 7   | BFR-CA-8980  | 2010              | Deer                | 855     | 33  | 39  | 30  | 79  | 104 | 35  | 17  | 1A    |
| 8   | BFR-CA-9124  | 2011              | Turkey, Appendix    | 1055    | 33  | 39  | 30  | 82  | 104 | 47  | 17  | 1A    |
| 9   | BFR-CA-9211  | 2011              | Chicken egg, Shell  | 4148    | 114 | 195 | 103 | 140 | 459 | 164 | 79  | 1C    |
| 10  | BFR-CA-9317  | 2011              | Ape, Faeces         | 827     | 33  | 39  | 30  | 82  | 104 | 56  | 17  | 1A    |
| 11  | BFR-CA-9614  | 2011              | Milk                | 827     | 33  | 39  | 30  | 82  | 104 | 56  | 17  | 1A    |
| 12  | BFR-CA-9625  | 2011              | Pig, Kidney         | 1056    | 32  | 39  | 30  | 82  | 104 | 43  | 36  | 1A    |
| 13  | BFR-CA-9707  | 2011              | Chicken, Heart      | 6825    | 33  | 39  | 30  | 116 | 113 | 47  | 17  | 1A    |
| 14  | BFR-CA-9965  | 2011              | Chicken, Liver      | 860     | 33  | 39  | 30  | 79  | 113 | 47  | 17  | 1A    |
| 15  | BFR-CA-10206 | 2012              | Pig, Meat           | 2869    | 33  | 38  | 44  | 82  | 104 | 44  | 17  | 1A    |
| 16  | BFR-CA-10225 | 2012              | Goose, Meat         | 1769    | 33  | 176 | 30  | 115 | 113 | 43  | 17  | 1A    |
| 17  | BFR-CA-10258 | 2012              | Duck, Meat          | 5162    | 33  | 66  | 30  | 79  | 113 | 43  | 17  | 1A    |
| 18  | BFR-CA-10460 | 2012              | Steer               | 1591    | 33  | 39  | 44  | 82  | 118 | 35  | 36  | 1A    |
| 19  | BFR-CA-10470 | 2012              | Turkey, Liver       | 860     | 33  | 39  | 30  | 79  | 113 | 47  | 17  | 1A    |
| 20  | BFR-CA-10623 | 2012              | Goat                | 825     | 33  | 39  | 30  | 82  | 113 | 47  | 17  | 1A    |
| 21  | BFR-CA-10659 | 2012              | Sheep               | 1750    | 33  | 39  | 30  | 115 | 113 | 43  | 17  | 1A    |
| 22  | BFR-CA-10673 | 2012              | Breeding pigeon     | 825     | 33  | 39  | 30  | 82  | 113 | 47  | 17  | 1A    |
| 23  | BFR-CA-10733 | 2012              | Turkey, Skin        | 3990    | 33  | 66  | 30  | 79  | 104 | 43  | 17  | 1A    |
| 24  | BFR-CA-10855 | 2012              | Calf, Faeces        | 825     | 33  | 39  | 30  | 82  | 113 | 47  | 17  | 1A    |
| 25  | Ty4222       | 2011              | Human faeces        | 854     | 33  | 38  | 30  | 82  | 104 | 43  | 17  | 1A    |
| 26  | Ty3717       | 2011              | Human faeces        | 6987    | 33  | 38  | 30  | 79  | 104 | 35  | 36  | 1A    |
| 27  | Ty5430       | 2011              | Human faeces        | 6988    | 33  | 39  | 30  | 81  | 118 | 44  | 36  | 1A    |
| 28  | Ty3946       | 2011              | Human faeces        | 825     | 33  | 39  | 30  | 82  | 113 | 47  | 17  | 1A    |
| 29  | Ty5293       | 2011              | Human faeces        | 854     | 33  | 38  | 30  | 82  | 104 | 43  | 17  | 1A    |
| 30  | Ty4279       | 2011              | Human faeces        | 901     | 33  | 39  | 30  | 79  | 104 | 43  | 41  | 1A    |
| 31  | Ty2856       | 2011              | Human faeces        | 6989    | 53  | 153 | 30  | 78  | 113 | 47  | 17  | 1A    |
| 32  | Ty3935       | 2011              | Human faeces        | 1100    | 33  | 39  | 30  | 82  | 104 | 44  | 36  | 1A    |

|    |              |      |                              |      |     |     |     |     |     |     |    |       |
|----|--------------|------|------------------------------|------|-----|-----|-----|-----|-----|-----|----|-------|
| 33 | Ty09380      | 2011 | Human faeces                 | 7017 | 53  | 66  | 30  | 82  | 104 | 47  | 17 | 1A    |
| 34 | Ty4536       | 2010 | Human faeces                 | 1056 | 33  | 39  | 30  | 82  | 104 | 43  | 36 | 1A    |
| 35 | Ty32545      | 2011 | Human faeces                 | 854  | 33  | 38  | 30  | 82  | 104 | 43  | 17 | 1A    |
| 36 | Ty4543       | 2011 | Human faeces                 | 828  | 33  | 39  | 30  | 82  | 104 | 43  | 17 | 1A    |
| 37 | Ty2048       | 2011 | Human faeces                 | 827  | 33  | 39  | 30  | 82  | 104 | 56  | 17 | 1A    |
| 38 | Ty2384       | 2011 | Human faeces                 | 1127 | 33  | 153 | 30  | 82  | 104 | 43  | 17 | 1A    |
| 39 | Ty4191       | 2011 | Human faeces                 | 1172 | 53  | 39  | 44  | 82  | 118 | 35  | 36 | 1A    |
| 40 | Ty5587       | 2011 | Human faeces                 | 854  | 33  | 38  | 30  | 82  | 104 | 43  | 17 | 1A    |
| 41 | Ty5165       | 2011 | Human faeces                 | 1628 | 33  | 39  | 30  | 79  | 104 | 206 | 17 | 1A    |
| 42 | Ty4207       | 2011 | Human faeces                 | 854  | 33  | 38  | 30  | 82  | 104 | 43  | 17 | 1A    |
| 43 | BFR-CA-6266  | 2007 | Quail                        | 829  | 33  | 39  | 30  | 82  | 113 | 43  | 17 | 1A    |
| 44 | BFR-CA-6377  | 2008 | Chicken, Meat                | 1600 | 33  | 39  | 65  | 140 | 104 | 43  | 17 | 1A    |
| 45 | BFR-CA-6656  | 2008 | Boar, Meat                   | 1680 | 53  | 38  | 30  | 81  | 118 | 225 | 36 | 1A    |
| 46 | BFR-CA-7041  | 2008 | Chicken, Meat                | 829  | 33  | 39  | 30  | 82  | 113 | 43  | 17 | 1A    |
| 47 | BFR-CA-7417  | 2009 | Swan                         | 855  | 33  | 39  | 30  | 79  | 104 | 35  | 17 | 1A    |
| 48 | BFR-CA-230   | 2009 | Laying hen                   | 3026 | 33  | 39  | 30  | 82  | 104 | 283 | 41 | 1A    |
| 49 | BFR-CA-8320  | 2009 | Piglet, Faeces               | 854  | 33  | 38  | 30  | 82  | 104 | 43  | 17 | 1A    |
| 50 | BFR-CA-8905  | 2010 | Pig, Liver                   | 854  | 33  | 38  | 30  | 82  | 104 | 43  | 17 | 1A    |
| 51 | BFR-CA-9009  | 2010 | Goat                         | 829  | 33  | 39  | 30  | 82  | 113 | 43  | 17 | 1A    |
| 52 | BFR-CA-9226  | 2011 | Duck, Meat                   | 855  | 33  | 39  | 30  | 79  | 104 | 35  | 17 | 1A    |
| 53 | BFR-CA-9271  | 2010 | Chicken, Liver               | 1628 | 33  | 39  | 30  | 79  | 104 | 206 | 17 | 1A    |
| 54 | BFR-CA-9310  | 2008 | Goose, Stomach               | 1628 | 33  | 39  | 30  | 79  | 104 | 206 | 17 | 1A    |
| 55 | BFR-CA-9316  | 2008 | Northern shoveler, Intestine | 827  | 33  | 39  | 30  | 82  | 104 | 56  | 17 | 1A    |
| 56 | BFR-CA-9540  | 2011 | Broiler, Skin                | 828  | 33  | 39  | 30  | 82  | 104 | 43  | 17 | 1A    |
| 57 | BFR-CA-9557  | 2011 | Broiler, Heart               | 1589 | 33  | 39  | 30  | 82  | 189 | 43  | 17 | 1A    |
| 58 | BFR-CA-9623  | 2011 | Lamb, Meat                   | 6990 | 32  | 66  | 66  | 82  | 113 | 43  | 17 | 1(B)  |
| 59 | BFR-CA-9625  | 2011 | Pig, Kidney                  | 1571 | 32  | 39  | 30  | 82  | 104 | 43  | 36 | 1A    |
| 60 | BFR-CA-9733  | 2011 | Chicken, Meat                | 832  | 33  | 39  | 30  | 79  | 113 | 43  | 17 | 1A    |
| 61 | BFR-CA-9743  | 2011 | Ape                          | 5150 | 292 | 66  | 30  | 82  | 113 | 206 | 17 | 1B    |
| 62 | BFR-CA-9870  | 2011 | Broiler, Skin                | 7019 | 33  | 39  | 411 | 79  | 113 | 43  | 17 | 1A    |
| 63 | BFR-CA-10044 | 2011 | Duck, Meat                   | 860  | 33  | 39  | 30  | 79  | 113 | 47  | 17 | 1A    |
| 64 | BFR-CA-10137 | 2012 | Sheep foetus, Stomach        | 6991 | 33  | 38  | 30  | 82  | 104 | 85  | 36 | 1A    |
| 65 | BFR-CA-10382 | 2012 | Bovine, Meat                 | 827  | 33  | 39  | 30  | 82  | 104 | 56  | 17 | 1A    |
| 66 | BFR-CA-10430 | 2012 | Calf, Faeces                 | 4679 | 33  | 38  | 30  | 82  | 113 | 43  | 36 | 1A    |
| 67 | BFR-CA-10783 | 2012 | Turkey, Appendix             | 1058 | 33  | 39  | 30  | 82  | 104 | 35  | 17 | 1A    |
| 68 | BFR-CA-10865 | 2012 | Turkey, Skin                 | 1191 | 33  | 39  | 30  | 82  | 189 | 47  | 17 | 1A    |
| 69 | meC0281      | 2009 | Turkey                       | 6992 | 118 | 39  | 30  | 79  | 429 | 3   | 12 | 5 (?) |
| 70 | meC0467      | 2009 | Turkey                       | 6993 | 33  | 39  | 30  | 82  | 113 | 3   | 12 | 5 (?) |

|     |                  |      |                            |      |     |     |     |     |     |     |     |                  |
|-----|------------------|------|----------------------------|------|-----|-----|-----|-----|-----|-----|-----|------------------|
| 71  | meC0280          | 2009 | Turkey                     | 6994 | 33  | 39  | 30  | 79  | 503 | 25  | 294 | 5 (?)            |
| 72  | RM2228-ST1063    | 1998 | Chicken                    | 1063 | 33  | 39  | 30  | 140 | 113 | 43  | 41  | 1A               |
| 73  | CCS48462         | 2008 | Chicken, Meat              | 7852 | 86  | 39  | 30  | 82  | 113 | 332 | 17  | 1B               |
| 74  | CCS48466         | 2008 | Chicken, Meat              | 7853 | 33  | 38  | 30  | 82  | 104 | 332 | 36  | 1A               |
| 75  | CCS48468         | 2008 | Chicken, Meat              | 7853 | 33  | 38  | 30  | 82  | 104 | 332 | 36  | 1A               |
| 76  | CCS17341/20      | 2006 | Environmental waters       | 7907 | 121 | 492 | 451 | 659 | 317 | 208 | 485 | 3                |
| 77  | CCS1377          | 2008 | Environmental waters       | 7908 | 334 | 552 | 30  | 241 | 598 | 600 | 471 | 4(?)             |
| 78  | CCS248 07/13820  | 2007 | Environmental waters       | 7855 | 33  | 39  | 30  | 79  | 104 | 35  | 211 | 1A               |
| 79  | CCS52236         | 2008 | Chicken, Meat              | 7856 | 33  | 39  | 30  | 82  | 104 | 65  | 17  | 1A               |
| 80  | CCS17343/21      | 2006 | Environmental waters       | 5603 | 136 | 188 | 69  | 113 | 270 | 277 | 152 | 1B               |
| 81  | CCS290 08 556    | 2008 | Environmental waters       | 7857 | 135 | 188 | 69  | 113 | 143 | 332 | 152 | 1B               |
| 82  | CCS17344/23      | 2006 | Environmental waters       | 5658 | 130 | 240 | 87  | 276 | 335 | 126 | 194 | 2                |
| 83  | CCS554           | 2008 | Environmental waters       | 2269 | 130 | 86  | 88  | 245 | 288 | 129 | 76  | 2                |
| 84  | CCS264 07/14004  | 2007 | Environmental waters       | 7121 | 32  | 39  | 44  | 82  | 104 | 44  | 17  | 1A               |
| 85  | CCS551           | 2008 | Environmental waters       | 7854 | 86  | 528 | 88  | 269 | 755 | 316 | 156 | 2                |
| 86  | CCS265 07/14005  | 2007 | Environmental waters       | 7909 | 121 | 553 | 452 | 602 | 738 | 240 | 183 | 3                |
| 87  | CCS29782         | 2008 | Chicken, Meat              | 7858 | 33  | 38  | 66  | 115 | 104 | 43  | 17  | 1A               |
| 88  | 24907/13784      | 2007 | Environmental waters       | 7859 | 137 | 189 | 174 | 241 | 756 | 126 | 76  | 2                |
| 89  | CCS48467         | 2008 | Chicken, Meat              | 7853 | 33  | 38  | 30  | 82  | 104 | 332 | 36  | 1A               |
| 90  | CCS52230         | 2008 | Chicken, Meat              | 3702 | 33  | 39  | 30  | 82  | 113 | 65  | 17  | 1A               |
| 91  | CCS07/803        | 2007 | Environmental waters       | 7862 | 398 | 189 | 86  | 269 | 701 | 599 | 153 | 2                |
| 92  | CCS33759         | 2008 | Chicken, Meat              | 3702 | 33  | 39  | 30  | 82  | 113 | 65  | 17  | 1A               |
| 93  | CCS47509         | 2008 | Chicken, Meat              | 7860 | 33  | 38  | 30  | 82  | 118 | 332 | 36  | 1A               |
| 94  | CCS24982/43      | 2006 | Environmental waters       | 7863 | 130 | 440 | 370 | 276 | 757 | 129 | 156 | 2                |
| 95  | CCS17343/22      | 2006 | Environmental waters       | 1981 | 136 | 86  | 88  | 124 | 266 | 238 | 95  | 2                |
| 96  | CCS289 08/401    | 2008 | Environmental waters       | 7910 | 121 | 39  | 453 | 660 | 758 | 584 | 470 | 3                |
| 97  | A12              | 2000 | Human faeces               | 7861 | 130 | 39  | 44  | 82  | 104 | 44  | 68  | 1B               |
| 98  | 81-176           | 1989 | Human faeces               | 913  | 1   | 2   | 3   | 27  | 5   | 9   | 6   | <i>C. jejuni</i> |
| 99  | NCTC11168        | 1977 | Human faeces               | 267  | 4   | 7   | 40  | 4   | 42  | 51  | 1   | <i>C. jejuni</i> |
| 100 | 84-25            | 1986 | Human, Cerebrospinal fluid | 43   | 2   | 1   | 5   | 3   | 4   | 1   | 5   | <i>C. jejuni</i> |
| 101 | 81116/NCTC 11828 | 1985 | Human faeces               | 185  | 2   | 1   | 1   | 3   | 1   | 1   | 5   | <i>C. jejuni</i> |

**Supplementary Table 2. Overview of all isoforms included in the *C. coli* proteotyping scheme**

| Locus                             | Full name / product (ORF Locus tag in RM4661) | calc. average Mass [Da] |           | Frequency in database |
|-----------------------------------|-----------------------------------------------|-------------------------|-----------|-----------------------|
| RpmJ/BACT000065; L36; YSS_RS00895 |                                               |                         |           |                       |
| sequence                          | MKVRPSVKKMCDKCKVRRKGVVRIICENPKHKQRQG* (37 aa) |                         |           |                       |
| 1*                                | RM4661 reference isoform                      | 4364.39 Da              | ±0.00 Da  | 99.936 % (1564/1565)  |
| 2                                 | MKVRPSVKKMCDKCKIVRRKGVVRIICENPKHKQRQG* (V16I) | 4378.41 Da              | +14.02 Da | 0.064 % (1/1565)      |
| 3*                                | MKVRPSIKKMCDKCKVRRKGVVRIICENPKHKQRQG* (V7I)   | 4378.41 Da              | +14.02 Da | new                   |

|                                   |                                                       |            |           |                      |
|-----------------------------------|-------------------------------------------------------|------------|-----------|----------------------|
| RpmH/BACT000063; L34; YSS_RS04330 |                                                       |            |           |                      |
| sequence                          | MKRTYQPHGTPRKRTTHGFRVRMKTKNRQVINARRAKGRKRLAV* (44 aa) |            |           |                      |
| 1*                                | RM4661 reference isoform                              | 5244.28 Da | ±0.00 Da  | 99.550 % (1549/1556) |
| 2                                 | MKRTYQPHGTPRKRTTHGFRVRMKTKNRQVINARRAKGRKRLAV* (V30M)  | 5276.34 Da | +32.06 Da | 0.257 % (4/1556)     |
| 3                                 | MKRTYQPHGTPRKRTTHGFRVRMKTKNRQVINARRSKGRKRLAV* (A36S)  | 5260.28 Da | +16.00 Da | 0.193 % (3/1556)     |

|                                     |                                                            |            |           |                      |
|-------------------------------------|------------------------------------------------------------|------------|-----------|----------------------|
| RpmF/BACT000061; L32-M; YSS_RS01420 |                                                            |            |           |                      |
| sequence                            | (M)AVPKRRVSKTRAAKRRTHYKVSLPMPKDKDGSYKMPHRANPNTKEY* (47 aa) |            |           |                      |
| 1*                                  | RM4661 reference isoform                                   | 5509.45 Da | ±0.00 Da  | 99.297 % (1554/1565) |
| 2                                   | (M)AVPKRRVSKTRAAKRRTHYKVSLPMPKDKDGSYKMPHRANPNTKEY* (K29R)  | 5537.46 Da | +28.01 Da | 0.383 % (6/1565)     |
| 3                                   | (M)TVPKRRVSKTRAAKRRTHYKVSLPMPKDKDGSYKMPHRANPNTKEY* (A2T)   | 5539.47 Da | +30.02 Da | 0.128 % (2/1565)     |
| 4                                   | (M)VVPKRRVSKTRAAKRRTHYKVSLPMPKDKDGSYKMPHRANPNTKEY* (A2V)   | 5537.50 Da | +28.05 Da | 0.064 % (1/1565)     |
| 5                                   | (M)AVPKRRVSKTRAAKRRTHYEVSLPMPKDKDGSYKMPHRANPNTKEY* (K21E)  | 5510.39 Da | +0.94 Da  | 0.064 % (1/1565)     |
| 6                                   | (M)AVPKRRVSKTRAAKRRTHYKVSLEIPKDKDGSYKMPHRANPNTKEY* (M26I)  | 5491.41 Da | -18.04 Da | 0.064 % (1/1565)     |

| RpmG/BACT000062; L33; YSS_RS02145 |                                                                     |            |           |                      |
|-----------------------------------|---------------------------------------------------------------------|------------|-----------|----------------------|
| sequence                          | MRIKVGLKCEECGDINYSTYKNGKNTTEKLELKKYCPRLKKHTLHKEVKLKS* (52 aa)       |            |           |                      |
| 1*                                | RM4661 reference isoform                                            | 6126.27 Da | ±0.00 Da  | 90.845 % (1419/1562) |
| 2*                                | MRIKVGLKCEECGDINYSTYKNSKNTTEKLELKKYCPRLKKHTLHKEVKLKS* (G23S)        | 6156.29 Da | +30,02 Da | 6.017 % (94/1562)    |
| 3                                 | MRIKVGLKCEECGDINYSTYKNGKNTIEKLELKKYCPRLKKHTLHKEVKLKS* (T27I)        | 6138.32 Da | +12,05 Da | 1.152 % (18/1562)    |
| 4                                 | MRIKVGLKCEECGDINYSTYKNGKNTTEKLELNKYCPRLKKHTLHKEVKLKS* (K33N)        | 6112.20 Da | -14,07 Da | 0.128 % (2/1562)     |
| 5*                                | MRIKVGLKCEECGDINYSTYKNSKNTTDKLELKKYCPRLKKHTLHKEVKLKS* (G23S + E28D) | 6142.27 Da | +16.00 Da | 1.644 % (26/1562)    |
| 6                                 | MRIKVGLKCEECGDINYSTYKNSKNTTEKLELKKYCPRLKKNTLHKEVKLKS* (G23S + H42N) | 6133.25 Da | +6.98 Da  | 0.064 % (1/1562)     |
| 7                                 | MRIKVGLKCEECGDINYSTYKNGKNTTEKLELKKYCPKLLKHTLHKEVKLKS* (R38K)        | 6098.25 Da | -28.02 Da | 0.128 % (2/1562)     |

| RpsN/BACT000014; S14-M; YSS_RS09385 |                                                                             |            |           |                      |
|-------------------------------------|-----------------------------------------------------------------------------|------------|-----------|----------------------|
| sequence                            | (M) AKKSMIAKAARKPKFKVRYTRCQICGRPHSVYRDFGICRVCLRKMGNEGLIPGLKASW* (60 aa)     |            |           |                      |
| 1*                                  | RM4661 reference isoform                                                    | 6811.24 Da | ±0.00 Da  | 99.361 % (1555/1565) |
| 2                                   | (M) AKKSMIAKAARKPKFKVRA YTRCQICGRPHSVYRDFGICRVCLRKMGNEGLIPGLKASW* (G20A)    | 6825.27 Da | +14.03 Da | 0.511 % (8/1565)     |
| 3                                   | (M) AKKSMI TKAARKPKFKVRYTRCQICGRPHSVYRDFGICRVCLRKMGNEGLIPGLKASW* (A8T)      | 6841.27 Da | +30,03 Da | 0.128 % (2/1565)     |
| 4*                                  | (M) AKKSMIAKAARKPKFSVRGYTRCQICGRPHSVYRDFGICRVCLRKMANEGLIPGLKASW*(K17S+G48A) | 6784.17 Da | -27.07 Da | new                  |

| RpmC/BACT000058; L29; YSS_RS09410 |                                                                            |            |           |                      |
|-----------------------------------|----------------------------------------------------------------------------|------------|-----------|----------------------|
| sequence                          | MKYTEIKDKTAAELATMLKEKKVLLFTLKQKLTMQLTNPKEISEVRKDIARINTAINALK* (61 aa)      |            |           |                      |
| 1*                                | RM4661 reference isoform                                                   | 7034.48 Da | ±0.00 Da  | 96.869 % (1516/1565) |
| 2                                 | MKYTEIKDKTAAELATMLKEKKVLLFTLKQKLTMQLTNPKEISQVKDIARINTAINALK* (E45Q + R47K) | 7005.48 Da | -29.00 Da | 2.428 % (38/1565)    |

| RpmC/BACT000058; L29; YSS_RS09410 |                                                                                                                                 |            |           |                  |
|-----------------------------------|---------------------------------------------------------------------------------------------------------------------------------|------------|-----------|------------------|
| 3                                 | MKYI <b>I</b> EIKDKTAAELATMLKEKKVLLF <b>T</b> LKQKLK <b>T</b> MQLTNPKEI <b>S</b> EV <b>R</b> KDIARINTAINALK* (T4I)              | 7046.53 Da | +12.05 Da | 0.128 % (2/1565) |
| 4                                 | MKYTEIKDKTAAELATMLKEKKVLLF <b>T</b> LKQKL <b>T</b> MQLTNPKEI <b>S</b> Q <b>V</b> KKDIARINTAINAL <b>R</b> * (E45Q + R47K + K61R) | 7033.49 Da | -0.99 Da  | 0.319 % (5/1565) |
| 5                                 | MK <b>H</b> TEIKDKTAAELATMLKEKKVLLF <b>T</b> LKQKL <b>T</b> MQLTNPKEI <b>S</b> EV <b>R</b> KDIARINTAINALK* (Y3H)                | 7008.44 Da | -26.04 Da | 0.192 % (3/1565) |
| 6*                                | MKYTEIKDKTAAELATMLKEKKVLLF <b>T</b> LKQKL <b>T</b> MQLTNPKEI <b>S</b> Q <b>A</b> KKDIARINTAINALK* (E45Q+V46A+R47K)              | 6977.43 Da | -57,05 Da | new              |

| RpmB/BACT000057; L28-M; YSS_RS02020 |                                                                                                                                              |            |           |                      |
|-------------------------------------|----------------------------------------------------------------------------------------------------------------------------------------------|------------|-----------|----------------------|
| sequence                            | (M)ARICQITGKGPMVGNNVSHANNKTKRRFLPNLRTV <b>R</b> VTLEDG <b>T</b> TRKMRIAAS <b>T</b> LR <b>T</b> LK <b>K</b> QNSK* (63 aa)                     |            |           |                      |
| 1*                                  | RM4661 reference isoform                                                                                                                     | 7078.30 Da | ±0.00 Da  | 98.082 % (1534/1564) |
| 2*                                  | (M)ARICQITGKGPMVGNNVSHANNKTKRRFLPNLRTV <b>R</b> VTLEDG <b>T</b> TRKMRIAAS <b>T</b> LR <b>T</b> LK <b>K</b> QNS <b>N</b> * (K64N)             | 7064.23 Da | -14.07 Da | 1.662 % (26/1564)    |
| 3                                   | (M)AR <b>V</b> CQITGKGPMVGNNVSHANNKTKRRFLPNLRTV <b>R</b> VTLEDG <b>T</b> TRKMRIAAS <b>T</b> LR <b>T</b> LK <b>K</b> QNSK* (I4V)              | 7064.27 Da | -14.03 Da | 0.128 % (2/1564)     |
| 4                                   | (M)ARICQITGKGPMVGNNVSHANNKTKRRFLPNL <b>R</b> I <b>V</b> RV <b>T</b> LEDG <b>T</b> TRKMRIAAS <b>T</b> LR <b>T</b> LK <b>K</b> QNSK* (T35I)    | 7090.36 Da | +12.06 Da | 0,128 % (2/1564)     |
| 5*                                  | (M)AR <b>V</b> CQ <b>V</b> TGKGPMVGNNVSHANNKTKRRFLPNLRTV <b>R</b> VTLEDG <b>T</b> TRKMRIAAS <b>T</b> LR <b>T</b> LK <b>K</b> QNSK* (I4V+I7V) | 7050.25 Da | -28.05 Da | new                  |

| RpmI/BACT000064; L35-M; YSS_RS08275 |                                                                                                                                                                                                                                   |            |           |                      |
|-------------------------------------|-----------------------------------------------------------------------------------------------------------------------------------------------------------------------------------------------------------------------------------|------------|-----------|----------------------|
| sequence                            | (M)PKMKS <b>V</b> SAV <b>K</b> RFK <b>V</b> KG <b>N</b> KIKRGS <b>A</b> FR <b>S</b> HIL <b>T</b> KK <b>P</b> AK <b>R</b> MRDL <b>R</b> TAKY <b>V</b> H <b>S</b> T <b>N</b> V <b>K</b> AVE <b>K</b> ML <b>G</b> I* (62 aa)         |            |           |                      |
| 1*                                  | RM4661 reference isoform                                                                                                                                                                                                          | 7080.06 Da | ±0.00 Da  | 99.616 % (1557/1563) |
| 2                                   | (M)PKMKS <b>V</b> SAV <b>K</b> RFK <b>V</b> KG <b>N</b> KIKRGS <b>A</b> FR <b>S</b> HIL <b>T</b> KK <b>P</b> AK <b>R</b> MR <b>G</b> L <b>R</b> TAKY <b>V</b> H <b>S</b> T <b>N</b> V <b>K</b> AVE <b>K</b> ML <b>G</b> I* (D42G) | 7022.58 Da | -57.48 Da | 0.320 % (5/1563)     |
| 3                                   | (M)PKMKS <b>V</b> SAV <b>K</b> RFK <b>V</b> KG <b>N</b> KIKRGS <b>A</b> FR <b>S</b> HIL <b>T</b> KK <b>P</b> AK <b>R</b> MR <b>N</b> L <b>R</b> TAKY <b>V</b> H <b>S</b> T <b>N</b> V <b>K</b> AVE <b>K</b> ML <b>G</b> I* (D42N) | 7079.64 Da | -0.42 Da  | 0.064 % (1/1563)     |

| RpmE/BACT000060; L31; YSS_RS08510 |                                                                               |            |            |                      |
|-----------------------------------|-------------------------------------------------------------------------------|------------|------------|----------------------|
| sequence                          | MKKEIHPEYVECKVSCACGNTFVTKSNKSELRVDICSSCHPFFTGSEKIVDAAGRVEKFKKKYAMQ* (66 aa)   |            |            |                      |
| 1*                                | RM4661 reference isoform                                                      | 7463.68 Da | ±0.00 Da   | 99.361 % (1555/1565) |
| 2                                 | MKKEIHPEYVECKVSCACGNTFVTKSNKSELRVDICSSCYPFFTGSEKIVDAAGRVEKFKK KYAMQ* (H40Y)   | 7489.72 Da | +26.04 Da  | 0.064 % (1/1565)     |
| 3                                 | MKKEIHPEYVECKVSCACGNTFVTKSNKSELRVDICSSCHPFFTGSEKIVDAAGRVEKFKK KYSMQ* (A64S)   | 7479.68 Da | +16.00 Da  | 0.064 % (1/1565)     |
| 4                                 | MKKEIHPEYVECKVSCACGNTFVTKSNKSELRVDICSSCHPFFTGSEKIVDAAGRVEKFKK KYAMQ* (K61R)   | 7491.69 Da | +28.01 Da  | 0.128 % (2/1565)     |
| 5                                 | MKKEIHPEYVECKVSCACGNTFITKSNKSELRVDICSSCHPFFTGSEKIVDAAGRVEKFKK KYAMQ* (V23I)   | 7477.71 Da | +14.03 Da  | 0.192 % (3/1565)     |
| 6                                 | MKKEIHPEYVECKVSCACGNTFVTKSNKSELRVDICSSCHPFFTGSEKIVDAAGRVEKFKK KYAM* (Q66STOP) | 7335.55 Da | -128.13 Da | 0.128 & (2/1565)     |
| 7                                 | MKKEIHPEYVECKVSCACGNTFVTKSNKSELRVDICSSCHPFFTGSEKIIDAAGRVEKFKK KYAMQ* (V50I)   | 7477.71 Da | +14.03 Da  | 0.064 % (1/1565)     |

| RpIX/BACT000053; L24-M; YSS_RS09395 |                                                                                          |            |           |                      |
|-------------------------------------|------------------------------------------------------------------------------------------|------------|-----------|----------------------|
| sequence                            | (M)AVKLIKKGDSVKVITGDDKGKTGKVLAVYPKTLKVVVEGCKIAKKAIKPSEKNPNGGFINKEMPMDISNVAKVQE* (77 aa)  |            |           |                      |
| 1*                                  | RM4661 reference isoform                                                                 | 8151.75 Da | ±0.00 Da  | 94.633 % (1481/1565) |
| 2*                                  | (M)AVKLIKKGDSVKVITGDDKGKTGKVLAVYPKTLKVVVEGCKIAKKAIKPSEKNPNGG FMNKEMPMDISNVAKVQE* (I61M)  | 8169.78 Da | +18.03 Da | 1.534 % (24/1565)    |
| 3*                                  | (M)AVKLIKKGDSVKVITGDEKKGKTGKVLAVYPKTLKVVVEGCKIAKKAIKPSEKNPNGG FINKEMPMDISNVAKVQE* (D20E) | 8165.78 Da | +14.03 Da | 3.131 % (49/1565)    |
| 4                                   | (M)AVKLIKKGDSVKVITGDDKGKTGKVLAVYPKTLKVVVEGCKIAKKAIKPSEKNPNGG FINKEMPIDISNVAKVQE* (M67I)  | 8133.72 Da | -18.03 Da | 0.192 % (3/1565)     |
| 5                                   | (M)AVKLIKKGDSVKIITGDDKGKTGKVLAVYPKTLKVVVEGCKIAKKAIKPSEKNPNGG FINKEMPMDISNVAKVQE* (V15I)  | 8165.78 Da | +14.03 Da | 0.383 % (6/1565)     |
| 6                                   | (M)AVKLIKKGDSVKVITGDDKGKTGKVLAVYPKTLKVVVEGCKIAKKAIKPSEKNPNGG FINKV-PMDISNVAKVQE * (E64V) | 8119.69 Da | -32,06 Da | 0.064 % (1/1565)     |
| 7                                   | (M)AVKLIKKGDSVKVIITGDDKGKTGKVLAVYPKTLKVVVEGCKIAKKAIKPSEKNPNGG FINKEMPMDISNVAKVQE* (T17I) | 8163.80 Da | +12.05 Da | 0.064 % (1/1565)     |
| 8*                                  | (M)AVKLIKKGDSVKVITGDDKGKIGKVLAVYPKTLKVVVEGCKIAKKAIKPSEKNPNGG FINKEMPMDISNVAKVQE* (T24I)  | 8163.80 Da | +12.05 Da | new                  |



|                                     |                                                                                                         |            |           |     |
|-------------------------------------|---------------------------------------------------------------------------------------------------------|------------|-----------|-----|
| RpIX/BACT000053; L24-M; YSS_RS09395 |                                                                                                         |            |           |     |
| 9*                                  | (M)AVKLIKIKGDSVKIITGDDKGGKTKGVLAVYPKTLKVVVEGCKIAKKA VKPSDKNPNGG<br>FINKEMPMDISNVAKVQE* (V15I+I49V+E53D) | 8137.72 Da | -32.06 Da | new |

| hypothetical protein DUF465 (Cj0449c homologue) |                                                                                                                                                      |            |            |                      |
|-------------------------------------------------|------------------------------------------------------------------------------------------------------------------------------------------------------|------------|------------|----------------------|
| sequence                                        | MLHEYRELMSELKGGKDAHFDKLFERHNELDDQIKDAEEGRNLLSDIEISNLKKEKLHIKDQLNQYLANYKK* (71 aa)                                                                    |            |            |                      |
| 1*                                              | RM4661 reference isoform                                                                                                                             | 8571.69 Da | ±0.00 Da   | 89.317 % (1020/1142) |
| 2*                                              | MLHEYRELMSELKGGKDAHFDKLFQRHNELDDQIKDAEEGRTPLSDL EISSLKKEKLHVKDE<br>LNQYLANYKK* (E24Q + N41T + L42P + I46L + N50S + I58V + Q61E)                      | 8501.59 Da | -70.10 Da  | 6.305 % (72/1142)    |
| 3                                               | MLHEYRELMSELKGGKDAHFDKLFERHNELDDQIKDAEEGRNLLSDIEISNLKKEKLYIKDQ<br>LNQYLANYKK* (H47Y)                                                                 | 8597.72 Da | +26.03 Da  | 0.701 % (8/1142)     |
| 4*                                              | MLHEYRELMSELKGGKDAHFDKLFERHNELDDQIKDAEEGRALLSDIEISNLKKEKLHIKDE<br>LNQYLSNYKK* (N41A + Q61E + A67S)                                                   | 8545.65 Da | -26.04Da   | 3.240 % (37/1142)    |
| 5                                               | MLHEYRELMSELKGGKDAHFDKLFDRHNELDDMIKDAEEGR TSLSSMEISTLKKEKLHVKDE<br>LSQYLANYKK* (E24D + Q32M + N41T + L42S + D45S + I46M + N50T + I58V + Q61E + N63S) | 8458.60 Da | -113.09 Da | 0.088 % (1/1142)     |
| 6                                               | MLHEYRELMSELKGGKDAHFDKLFERHNELDDQIKDAEEGRNLLSDIEISNLKKEKLHIKDR<br>LNQYLANYKK* (Q61R)                                                                 | 8599.74 Da | +28.05 Da  | 0.088 % (1/1142)     |
| 7*                                              | MLHEYRELISELKGGKDAHFDKLFERHNELDDQIKDAEEGRNLLSDIEISNLKKEKLHIKDQ<br>LNQYLANYKK* (M9I)                                                                  | 8553.65 Da | -18.04 Da  | 0.175 % (2/1142)     |
| 8                                               | MLHEYRELMSELKGGKDAYFDKLFERHNELDDQIKDAEEGRNLLSDIEISNLKKEKLHIKDQ<br>LNQYLANYKK* (H18Y)                                                                 | 8597.72 Da | +26.03 Da  | 0.088 % (1/1142)     |

| RpsP/BACT000016; S16; YSS_RS03245 |                                                                                          |            |           |                     |
|-----------------------------------|------------------------------------------------------------------------------------------|------------|-----------|---------------------|
| sequence                          | MTVIRLTRMGRTKRPFYRIVVTDSRKRRDGGWIESIGYYNPMVEPEVVKFDSERLAYWKS SVGAKLSDKVASITSK* (75 aa)   |            |           |                     |
| 1 *                               | RM4661 reference isoform                                                                 | 8728.16 Da | ±0.00 Da  | 0.985 % (1542/1565) |
| 2                                 | MTVIRLTRMGRTKRPFYRIVVTDSRKRRDGGWIESIGYYNPMVEPEVVKFDSERLAYWKS<br>V GAKLSDKVASIISK* (T73I) | 8740.21 Da | +12.05 Da | 0.383 % (6/1565)    |
| 3                                 | MTVIRLTRMGRTKRPFYRIVVTDSRKRRDGGWIESIGYYNPMVEPEVVKFDPERLAYWKS<br>V GAKLSDKVASITSK* (S52P) | 8738.20 Da | +10.04 Da | 0.064 % (1/1565)    |
| 4                                 | MTVIRLTRMGRTKRPFYRIVVTDSRKRRDGGWIESIGYYNPMVEPEVVKFDSERLAYWKS<br>V GAKLSDKVASITNK* (S74N) | 8755.18 Da | +27.02 Da | 0.191 % (5/1565)    |
| 5                                 | MTIIRLTRMGRTKRPFYRIVVTDSRKRRDGGWIESIGYYNPMVEPEVVKFDSERLAYWKS<br>V                        | 8742.18 Da | +14.02 Da | 0.192 % (3/1565)    |

| RpsP/BACT000016; S16; YSS_RS03245 |                                                                                        |            |           |                  |
|-----------------------------------|----------------------------------------------------------------------------------------|------------|-----------|------------------|
|                                   | GAKLSDKVASITSK* (V3I)                                                                  |            |           |                  |
| 6                                 | MTVIRLTRMGRIKRPFYRIVVTDSRKRRDGGWIESIGYYNPMVEPEVVKFDSERLAYWKS<br>GAKLSDKVASITSK* (T12I) | 8740.21 Da | 12.05 Da  | 0.192 % (3/1565) |
| 7                                 | MTVIRLTRMGRTKRPFYRIVVTDSRKRRDGGWIESIGYYNPMVKPEVVKFDSERLAYWKS<br>GAKLSDKVASITSK* (E44K) | 8727.22 Da | -0.94 Da  | 0.128 % (2/1565) |
| 8                                 | MTVIRLTRMGRTKRPFYRIVVTDSRKRRDGGWIESIGYYNPMVDPEVVKFDSERLAYWKS<br>GAKLSDKVASITSK* (E44D) | 8714.13 Da | -14.03 Da | 0.064 % (1/1565) |

| RpmA/BACT000056; L27-M; YSS_RS00440 |                                                                                                       |            |           |                      |
|-------------------------------------|-------------------------------------------------------------------------------------------------------|------------|-----------|----------------------|
| sequence                            | (M) AHKKGQGSTQNNRDSIGRRLGVKKFGGGEFVRAGNIIIRQRGTATHAGNNVGIGKDHTIFALIDGFVKFERKDKDRKKVSVYPA* (84 aa)     |            |           |                      |
| 1*                                  | RM4661 reference isoform                                                                              | 9135.42 Da | ±0.00 Da  | 93.482 % (1463/1565) |
| 2                                   | (M) AHKKGQGSTQNNRDSIGRRLGVKKFGGGEFVRAGNIIIRQRGTATHAGNNVGIGKDHTI<br>FALIDGFVKFERKDKDRKKVSVYPA* (A84V)  | 9163.47 Da | +28.05 Da | 3.323 % (52/1565)    |
| 3*                                  | (M) AHKKGQGSTQNNRDSIGRRLGVKKFGGGEFVRAGNIIIRQRGTATHAGNNVGMKDHTI<br>FALIDGFVKFERKDKDRKKVSVYPA* (M53I)   | 9153.45 Da | +18.03 Da | 3.131 % (49/1565)    |
| 4                                   | (M) AHKKGQGSTQNNRDSIGRRLGVKKFGGGEFVRAGNIIIRQRGTATHAGNNVGIGKDHTI<br>FALIDGFVKFERKDKDRKVKVSVYPA* (K77E) | 9136.36 Da | +0.94 Da  | 0.064 % (1/1565)     |

| RpsT/BACT000020; S20-M; YSS_RS00790 |                                                                                                              |            |           |                      |
|-------------------------------------|--------------------------------------------------------------------------------------------------------------|------------|-----------|----------------------|
| sequence                            | (M) ANHKSAEKRARQTIKKTERNRFYRTRLKNITKAVREAAAANKDKNAANEALKIANKSIHAMVSRGFLKKQTASRRVSRLLALLVNKIA* (86 aa)        |            |           |                      |
| 1                                   | RM4661 reference isoform                                                                                     | 9771.42 Da | ±0.00 Da  | 94.633 % (1481/1565) |
| 2*                                  | (M) ANHKSAEKRARQTIKKTERNRFYRTRLKNITKAVREAAAANKDKNAANEALKIANKSIH<br>AMASRGFLKKQTASRRVSRLLALLVNKIA* (V62A)     | 9743.37 Da | -37.05 Da | 3.323 % (52/1565)    |
| 3                                   | (M) ANHKSAEKRARQTIKKTERNRFYRTRLKNITKAVREAAAQNDKNAANEALKIANKGIH<br>AMVSRGFLKKQTASRRVSRLLALLVNKIA* (K41Q+S57G) | 9741.35 Da | -30.07 Da | 0.192 % (3/1565)     |
| 4*                                  | (M) ANHKSAEKRARQTIKKTERNRFYRTRLKNITKAVREAAAQNDKNAANEALKIANKSIH<br>AMVSRGFLKKQTASRRVSRLLALLVNKIA* (K41Q)      | 9771.38 Da | -0.03 Da  | 1.661 % (26/1565)    |
| 5                                   | (M) ANHKSAEKRARQTIKKTERNRFYRTRLKNITKAVREAAAANKDKNAANEALKIANKSIH<br>AMVSRGFLKKQTASRRVSRLLALLVNKIA* (D43N)     | 9770.44 Da | -0.98 Da  | 0.128 % (2/1565)     |

| RpsT/BACT000020; S20-M; YSS_RS00790 |                                                                                                                                                         |            |           |                  |
|-------------------------------------|---------------------------------------------------------------------------------------------------------------------------------------------------------|------------|-----------|------------------|
| 6                                   | (M) ANHKS <b>A</b> EKRARQT <b>I</b> KKTERNRFYRTRLKNITKAVREAAAKNDKNA <b>T</b> NEALKIANKSIH<br>AMVSRGFLKKQTASRRVSRLLLVNKIA* (A47T)                        | 9801.45 Da | +30.03 Da | 0.128 % (2/1565) |
| 7                                   | (M) ANHKS <b>A</b> EKRARQT <b>I</b> KKTERNRFYRTRLKNITKAVREAAAKNDKN <b>S</b> ANEALKIANKSIH<br>AMVSRGFLKKQTASRRVSRLLLVNKIA* (A46S)                        | 9787.42 Da | +16.00 Da | 0.128 % (2/1565) |
| 8*                                  | (M) ANHKS <b>S</b> EKRARQT <b>I</b> KKTERNRFYRTRLKNITKAVREAAQNNDKAAA <b>T</b> EAL <b>K</b> VANKSIH<br>AMVSRGFLKKQTASRRVSRLLLVNKIA* (A7S+A40Q+N48T+I53V) | 9760.35 Da | -11.07 Da | new              |

| RpsO/BACT000015; S15-M; YSS_RS04540 |                                                                                                                                                                                                          |             |           |               |
|-------------------------------------|----------------------------------------------------------------------------------------------------------------------------------------------------------------------------------------------------------|-------------|-----------|---------------|
| sequence                            | (M) ALDSAKKAEIVAKFARKAGDTGSTE <b>V</b> QVALLSARITELTEHLKIYKKDFSSRLG <b>L</b> LKLVGQRKRL <b>L</b> LAYLKRKD <b>Y</b> NSYSK <b>L</b> ITELNLRDK* (89 aa)                                                     |             |           |               |
| 1*                                  | RM4661 reference isoform                                                                                                                                                                                 | 10096.83 Da | ±0.00 Da  | % (16/1555)   |
| 2*                                  | (M) ALDSAKKAEIVAKFARKAGDTGSTE <b>V</b> QVALL <b>T</b> ARIA <b>E</b> LTEHLKIYKKDFSSRLG <b>L</b> LKLVGQRKRL <b>L</b> LAYLKRKD <b>Y</b> NSYSK <b>L</b> ITELNLRDK* (S33T + T37A)                             | 10080.83 Da | -16.00 Da | % (75/1555)   |
| 3*                                  | (M) ALDSAKKAEIVAKFARKAGDTGSTE <b>V</b> QVALLSARIA <b>E</b> LTEHLKIYKKDFSSRLG <b>L</b> LKLVGQRKRL <b>L</b> LAYLKRKD <b>Y</b> NSYSK <b>L</b> ITELNLRDK* (T37A)                                             | 10066.80 Da | -30.03 Da | % (1453/1555) |
| 4                                   | (M) ALDSAKKAEIVAKFARKAGDTGSTE <b>V</b> QVALL <b>S</b> TRIA <b>E</b> LTEHLKIYKKDFSSRLG <b>L</b> LKLVGQRKRL <b>L</b> LAYLKRKD <b>Y</b> NSYSK <b>L</b> ITELNLRDK* (A34T + T37A)                             | 10096.83 Da | ±0.00 Da  | % (1/1555)    |
| 5                                   | (M) ALDSAKKAEIVAKFARK <b>K</b> PGDTGSTE <b>V</b> QVALL <b>T</b> ARIA <b>E</b> LTEHLKIYKKDFSSRLG <b>L</b> LKLVGQRKRL <b>L</b> LAYLKRKD <b>Y</b> NSYSK <b>L</b> ITELNLRDK* (R17K + A19P + S33T + T37A)     | 10078.85 Da | -17.98 Da | % (4/1555)    |
| 6                                   | (M) ALDSAKKAEIVAKFARKA <b>S</b> DTGSTE <b>V</b> QVALLSARIA <b>E</b> LTEHLKIYKKDFSSRLG <b>L</b> LKLVGQRKRL <b>L</b> LAYLKRKD <b>Y</b> NSYSK <b>L</b> ITELNLRDK* (G20S + T37A)                             | 10096.83 Da | ±0.00 Da  | % (2/1555)    |
| 7                                   | (M) ALDSAKKAEIVAKFARK <b>K</b> PGDTGSTE <b>V</b> QVALL <b>T</b> ARIA <b>E</b> LTEHLKIYKKDFSSRLG <b>L</b> LKLVGQRKRL <b>S</b> YLKRKD <b>Y</b> NSYSK <b>L</b> ITELNLRDK* (R17K + A19P + S33T + T37A+ A68S) | 10094.85 Da | -1.98 Da  | % (2/1555)    |
| 8                                   | (M) ALDSAKKAEIVAKFARKAGDTGSTE <b>V</b> QVALLSARIA <b>E</b> LTEHLKIYKKDFSSRLG <b>L</b> LKLVGQRKRL <b>L</b> LAYLKRKD <b>Y</b> NSY <b>L</b> IAELNLRDK* (T37A + T83A)                                        | 10030.68 Da | -66.15 Da | % (1/1555)    |
| 9                                   | (M) ALDSAKKAEIVAKFARKAGDTGSTE <b>V</b> QVALLSARIA <b>E</b> LTEHLKIYKKDFSSRLG <b>L</b> LKLVGQRKRL <b>L</b> LAYLKRKD <b>Y</b> NSY <b>G</b> KLITELNLRDK* (T37A + S79G)                                      | 10030.68 Da | -66,15 Da | % (1/1555)    |

| RpsS/BACT000019; S19-M; YSS_RS09430 |                                                                                                                                                                |             |          |                      |
|-------------------------------------|----------------------------------------------------------------------------------------------------------------------------------------------------------------|-------------|----------|----------------------|
| sequence                            | (M) ARSLK <b>K</b> GPVDDHVMK <b>K</b> VIAAKKANDNKPIKTWSRRSTIIPDMIGLTFNVHNGKSFIPVYITENHIGYK <b>L</b> GEFAPTRTFKG <b>H</b> KGS <b>V</b> Q <b>K</b> KIGK* (92 aa) |             |          |                      |
| 1 *                                 | RM4661 reference isoform                                                                                                                                       | 10334.13 Da | ±0.00 Da | 97.636 % (1528/1565) |

| RpsS/BACT000019; S19-M; YSS_RS09430 |                                                                                                            |             |           |                   |
|-------------------------------------|------------------------------------------------------------------------------------------------------------|-------------|-----------|-------------------|
| 2                                   | (M)ARSLKKGPFVDDHVMKKVIAAKKANDNKPIKTWSRRSTIIPDMIGLTFNVHNGKSFIP<br>VYITENHIGYKLGEFAPTRTFKGHKGSVQKKIG* (I41T) | 10322.08 Da | -12.05 Da | 1.917 % (30/1565) |
| 3                                   | (M)ARSLKKGPFVDDHVMKKVIAAKKANDNKPIKTWSRRSTIIPDMIGLTFNVHNGKSFIP<br>VYITENHIGYKLGEFAPTRTFKGHKGSVQKKIG* (K24E) | 10335.07 Da | +0.94 Da  | 0.319 % (5/1565)  |
| 4                                   | (M)ARSLKKGPFVDDHVIKKVIAAKKANDNKPIKTWSRRSTIIPDMIGLTFNVHNGKSFIP<br>VYITENHIGYKLGEFAPTRTFKGHKGSVQKKIG* (M16I) | 10316.10 Da | -18.03 Da | 0.128 % (2/1565)  |

Legend:

\* observed in test population

AA numbering including start-methionine, if mass spectrometry indicates its absence it is written in brackets (M)

**Supplementary Table 3. Comparison of measured and calculated average and monoisotopic biomarker masses**

| <b>Biomarker</b> | <b>Isoform</b> | <b>Measured Mass [Da]</b> | <b>Standard deviation</b> | <b><math>\Delta</math> Measured mass/ Average mass</b> | <b>Monoisotopic mass [Da]</b> | <b>Average Mass [Da]</b> |
|------------------|----------------|---------------------------|---------------------------|--------------------------------------------------------|-------------------------------|--------------------------|
| L36              | Isoform 1      | 4365                      | 0.388                     | 0.61                                                   | 4361.43                       | 4364.39                  |
| L36              | Isoform 3      | 4378                      | 0.191                     | 0.41                                                   | 4375.45                       | 4378.41                  |
| L34              | Isoform 1      | 5245                      | 0.405                     | 0.72                                                   | 5505.99                       | 5244.28                  |
| L32-M            | Isoform 1      | 5510                      | 0.365                     | 0.55                                                   | 5505.99                       | 5509.45                  |
| L33              | Isoform 1      | 6127                      | 0.528                     | 0.73                                                   | 6122.28                       | 6126.27                  |
| L33              | Isoform 2      | 6155                      | 0.781                     | 1.29                                                   | 6152.29                       | 6156.29                  |
| L33              | Isoform 5      | 6143                      | 0.385                     | 0.73                                                   | 6138.27                       | 6142.27                  |
| S14-M            | Isoform 1      | 6810                      | 0.586                     | 1.24                                                   | 6806.67                       | 6811.24                  |
| S14-M            | Isoform 4      | 6784                      | 0.485                     | 0.17                                                   | 6779.63                       | 6784.17                  |
| L29              | Isoform 1      | 7035                      | 0.484                     | 0.52                                                   | 7029.99                       | 7034.48                  |
| L29              | Isoform 6      | 6977                      | 0.358                     | 0.43                                                   | 6972.97                       | 6977.43                  |
| L28-M            | Isoform 1      | 7078                      | 0.427                     | 0.30                                                   | 7073.91                       | 7078.30                  |
| L28-M            | Isoform 2      | 7065                      | 0.042                     | 0.77                                                   | 7059.86                       | 7064.23                  |
| L28-M            | Isoform 5      | 7050                      | 0.473                     | 0.25                                                   | 7045.88                       | 7050.25                  |
| L35-M            | Isoform 1      | 7080                      | 0.422                     | 0.06                                                   | 7076.11                       | 7080.06                  |
| L31              | Isoform 1      | 7463                      | 0.488                     | 0.68                                                   | 7458.66                       | 7463.68                  |
| L24-M            | Isoform 1      | 8151                      | 0.295                     | 0.75                                                   | 8164.54                       | 8151.75                  |
| L24-M            | Isoform 2      | 8169                      | 0.369                     | 0.78                                                   | 8146.58                       | 8169.78                  |
| L24-M            | Isoform 3      | 8165                      | 0.166                     | 0.78                                                   | 8160.60                       | 8165.78                  |
| L24-M            | Isoform 8      | 8163                      | 0.142                     | 0.80                                                   | 8158.62                       | 8163.80                  |
| L24-M            | Isoform 9      | 8137                      | 0.361                     | 0.72                                                   | 8132.57                       | 8137.72                  |
| HypProt          | Isoform 1      | 8572                      | 0.412                     | 0.31                                                   | 8566.38                       | 8571.69                  |
| HypProt          | Isoform 2      | 8502                      | 0.224                     | 0.41                                                   | 8496.33                       | 8501.59                  |
| HypProt          | Isoform 4      | 8546                      | 0.599                     | 0.35                                                   | 8540.35                       | 8545.65                  |
| HypProt          | Isoform 7      | 8555                      | 0.391                     | 1.35                                                   | 8548.42                       | 8553.65                  |
| S16              | Isoform 1      | 8729                      | 0.231                     | 0.84                                                   | 8722.64                       | 8728.16                  |
| L27-M            | Isoform 1      | 9136                      | 0.438                     | 0.58                                                   | 9147.90                       | 9135.42                  |
| L27-M            | Isoform 3      | 9154                      | 0.295                     | 0.55                                                   | 9129.95                       | 9153.45                  |
| S20-M            | Isoform 2      | 9743                      | 0.459                     | 0.37                                                   | 9765.55                       | 9743.37                  |
| S20-M            | Isoform 4      | 9772                      | 0.101                     | 0.62                                                   | 9765.51                       | 9771.38                  |
| S20-M            | Isoform 8      | 9760                      | 0.188                     | 0.35                                                   | 9754.50                       | 9760.35                  |
| S15-M            | Isoform 1      | 1096                      | 0.363                     | 0.83                                                   | 10090.71                      | 10096.83                 |
| S15-M            | Isoform 2      | 1080                      | 0.397                     | 0.83                                                   | 10074.71                      | 10080.83                 |
| S15-M            | Isoform 3      | 1066                      | 0.620                     | 0.80                                                   | 10060.70                      | 10066.80                 |
| S19-M            | Isoform 1      | 10335                     | 0.715                     | 0.87                                                   | 10327.66                      | 10334.13                 |

The measured biomarker masses and the corresponding standard deviations are based on six measurements. The molecular weight calculator in the ExpASY

Bioinformatics Resource Portal ([http://web.expasy.org/compute\\_pi/](http://web.expasy.org/compute_pi/)) was used to calculate average and monoisotopic biomarker masses.

**Supplementary Table 4. Listing of the Accession Numbers of the identified allelic isoforms of the biomarkers**

| <b>Biomarker</b> | <b>Isoform</b> | <b>Gene Accession</b> | <b>Protein Accession</b> |
|------------------|----------------|-----------------------|--------------------------|
| L36              | 1              | CP018900.1            | APT19528.1               |
| L36              | 3              | MK270367              | MK270367                 |
| L34              | 1              | CP028187.1            | AVS39538.1               |
| L32-M            | 1              | CP004066.1            | AGV10487.1               |
| L33              | 1              | CP028187.1            | AVS38169.1               |
| L33              | 2              | CP023545.1            | ATG67527.1               |
| L33              | 5              | CP024136.1            | WP_020975142.1           |
| S14-M            | 1              | CP007181.1            | AHK77725.1               |
| S14-M            | 4              | MK270368              | MK270368                 |
| L29              | 1              | CP025281.1            | AUG27826.1               |
| L29              | 6              | MK270369              | MK270369                 |
| L28-M            | 1              | CP028187.1            | AVS38189.1               |
| L28-M            | 2              | CP028187.1            | WP_020975162.1           |
| L28-M            | 5              | MK270370              | MK270370                 |
| L35-M            | 1              | CP007181.1            | AHK77513.1               |
| L31              | 1              | CP028187.1            | AVS38768.1               |
| L24-M            | 1              | CP007181.1            | AHK77727.1               |
| L24-M            | 2              | CP025281.1            | AUG27823.1               |
| L24-M            | 3              | CP017875.1            | APA58854.1               |
| L24-M            | 8              | MK270372              | MK270372                 |
| L24-M            | 9              | MK270371              | MK270371                 |
| HypProt          | 1              | CP028187.1            | AVS38190.1               |
| HypProt          | 2              | CP025281.1            | WP_020975163.1           |
| HypProt          | 4              | CP025283.1            | WP_038838694.1           |
| HypProt          | 7              | CP017873.1            | WP_002831949.1           |
| S16              | 1              | CP028187.1            | WP_002776499.1           |
| L27-M            | 1              | CP018900.1            | APT19449.1               |
| L27-M            | 3              | CP023545.1            | ATG66444.1               |
| S20-M            | 1              | CP017025.1            | AOH49294.1               |
| S20-M            | 2              | CP028187.1            | AVS38483.1               |
| S20-M            | 4              | HG326877.1            | CDG56774.1               |
| S20-M            | 8              | MK270374              | MK270374                 |
| S15-M            | 1              | CP007181.1            | AHK76813.1               |
| S15-M            | 2              | CP017878.1            | APA61584.1               |
| S15-M            | 3              | CP028187.1            | AVS39511.1               |
| S19-M            | 1              | CP017025.1            | AOH50892.1               |

The accession numbers for all detected biomarkers isoforms both for the gene/nucleotide sequence and for the amino acid sequence are given in the table below.



Supplementary Figures

Supplementary Figure 1. MLST based neighbor-joining dendrogram showing the different clades of *C. coli* and *C. jejuni*.

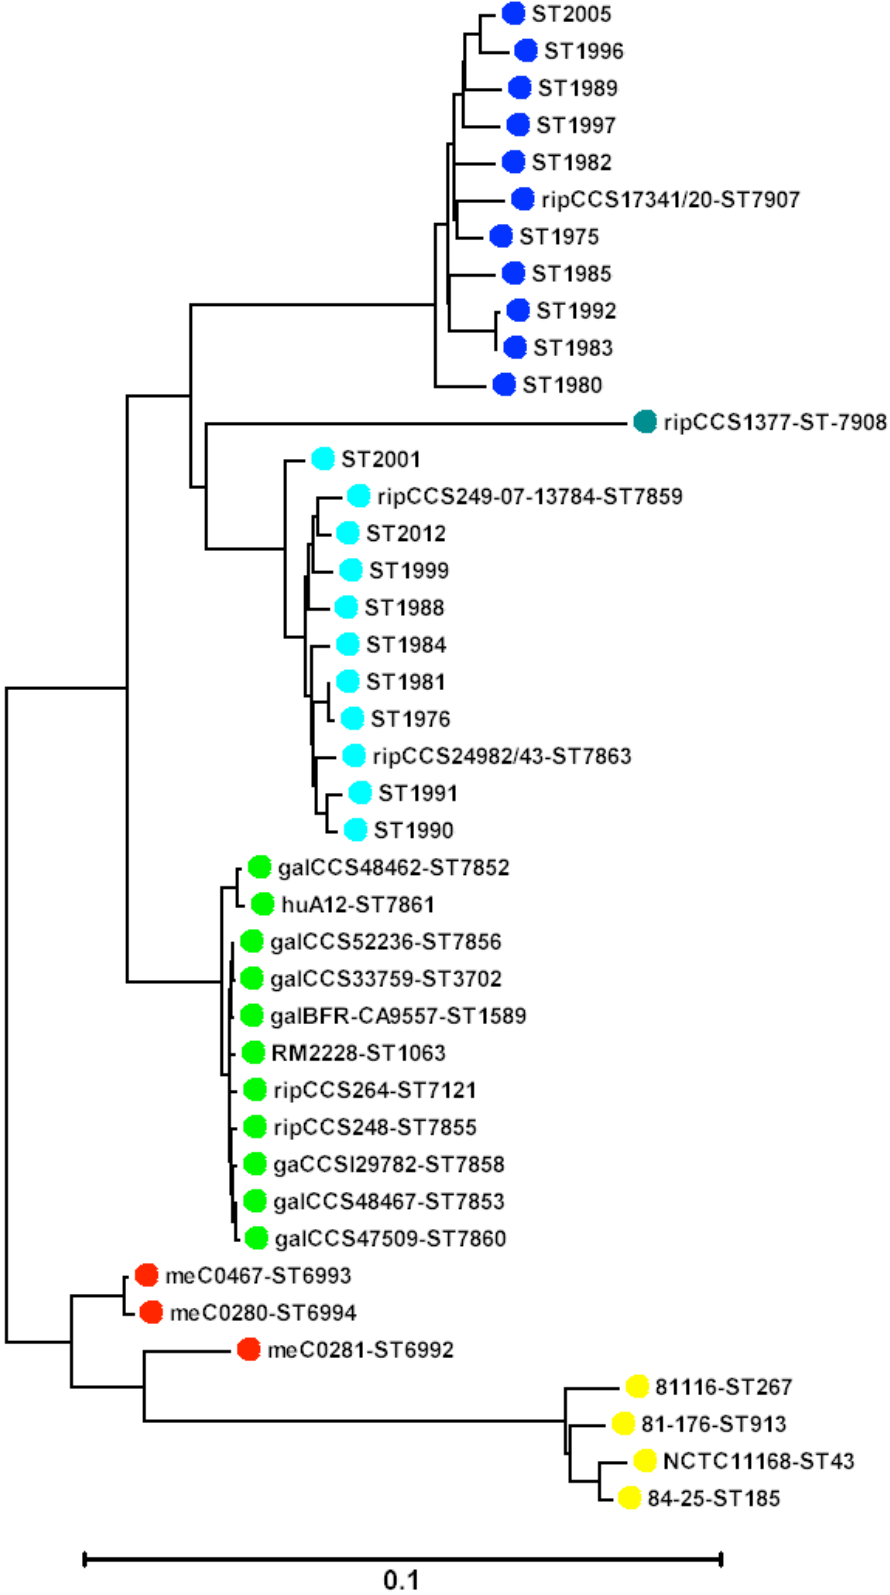

The depicted MLST-based neighbor-joining tree shows the phylogenetic relationship of the isolates CCS1377, meC0280, mecC0281, and meC0467 in relation to reference strains representing the established three *C. coli* clades and *C. jejuni*. The evolutionary history was inferred using the Neighbor-joining method<sup>57</sup>. The optimal tree with the sum of branch length = 0.509 is shown. The tree is drawn to scale, with branch lengths in the same units as those of the evolutionary distances used to infer the phylogenetic tree. The evolutionary distances were computed using the Maximum Composite Likelihood method<sup>58</sup> and are in the units of the number of base substitutions per site. Codon positions included were 1st+2nd+3rd+Noncoding. Evolutionary analyses were conducted in MEGA7<sup>55</sup>. Color codes: clade 1 – green, clade 2 – light blue, clade 3 – dark blue, isolate CCS1377 – dark green purple, isolates meC0280, mecC0281, and meC0467 – red, *C. jejuni* strains - yellow.

**Supplementary Figure 2. Phylogenetic relationship between *C. coli* and *C. jejuni* ssp. *jejuni* isolates.**

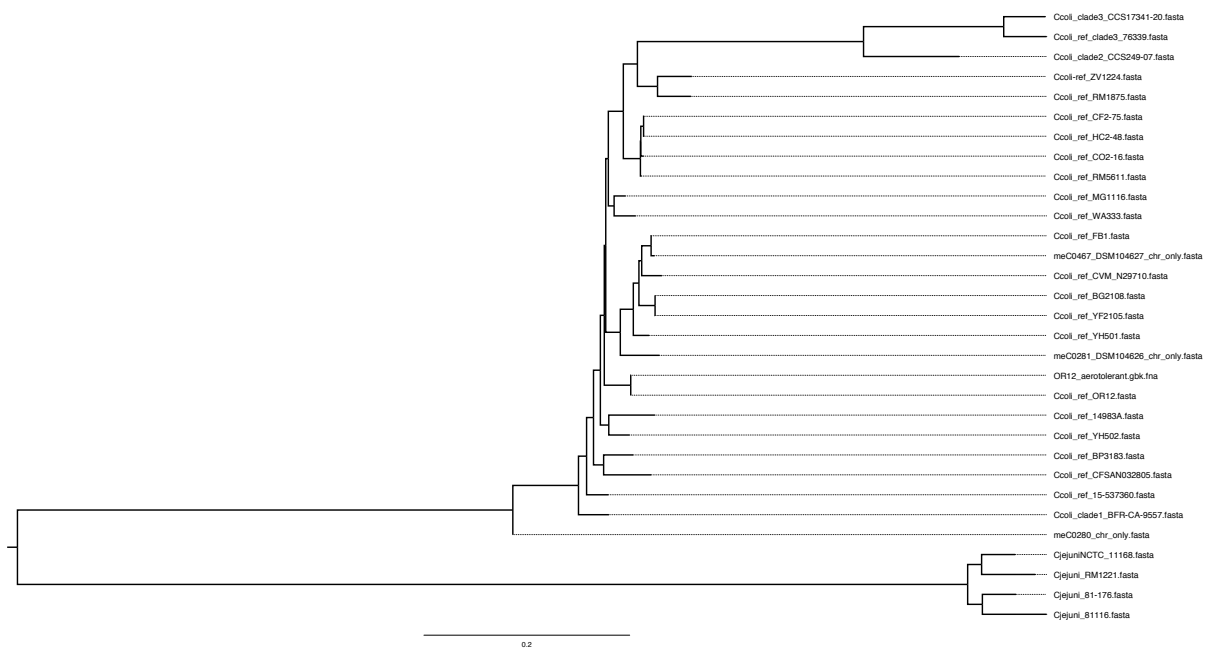

Core-genome alignments were derived from a set of 31 chromosomal genome sequences by using Parsnp. FastTree2<sup>59</sup> was used to calculate the maximum-likelihood (ML) phylogenetic tree. Parsnp and FastTree2 are both implemented in the Harvest package<sup>60</sup>. The ML tree includes 24 chromosomal genome sequences of *C. coli* isolates currently available in GenBank. In addition, the chromosomal genome sequences of meC0280, meC0281, and meC0467 as well as four *C. jejuni* reference chromosomal genomes sequences have been included in the tree.
